# Supplementary material
Source: PubMed Central journal article supplement (PMC3204736)
Supplement: supp_blood-2010-12-325373_Document1.pdf [file supp_blood-2010-12-325373_Document1.pdf]

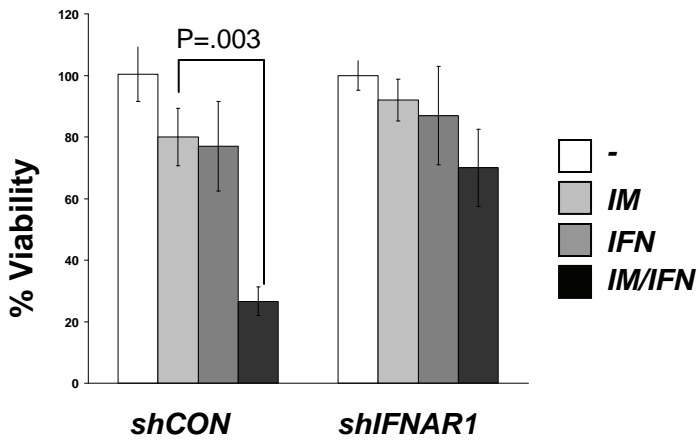

**Figure S1.** KT 1 cells were treated with either 0.5 $\mu$ M IM for 8 hours or 250 IU/mL of IFN $\alpha$  for 8 hours, or a combination (4 h + 4 h) and viability analyzed by MTT assay.

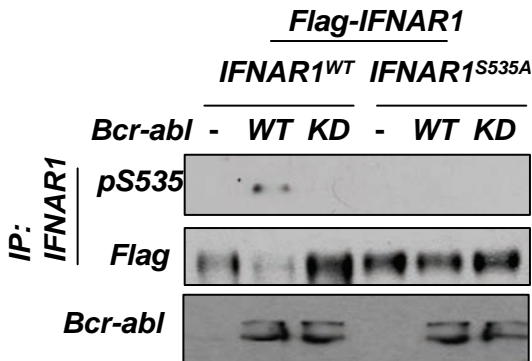

**Figure S2.** Expression of wild type (WT) p210-Bcr-Abl but not of its kinase deficient (KD) mutant in HeLa cells downregulates co-expressed Flag-IFNAR1 but not its ubiquitination-deficient S535A mutant.

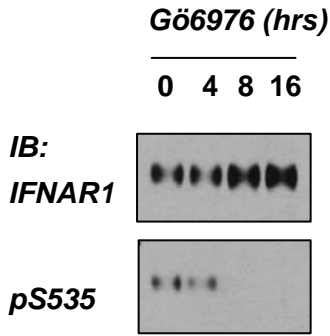

**Figure S3.** Treatment of KT1 cells with PKD inhibitor Gö6976 decreases IFNAR1 degraon phosphorylation but increases the levels of endogenous IFNAR1 (measured by IP-IB).

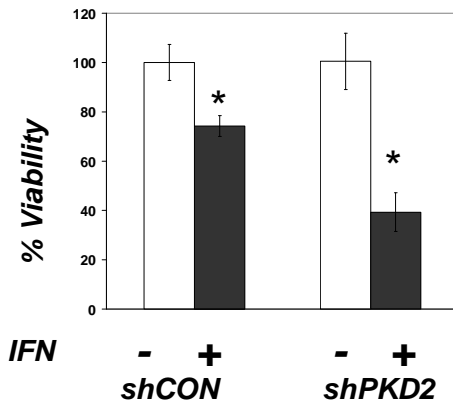

**Figure S4.** KT1 cells are more sensitive to interferon treatment following knockdown of PKD2 – MTT assay; \*  $p=0.0051$
